# Supplementary material
Source: PubMed Central journal article supplement (PMC2732826)
Supplement: 0904364106_0904364106SI.pdf [file 0904364106_0904364106SI.pdf]

# Supporting Information

Tsay et al. 10.1073/pnas.0904364106

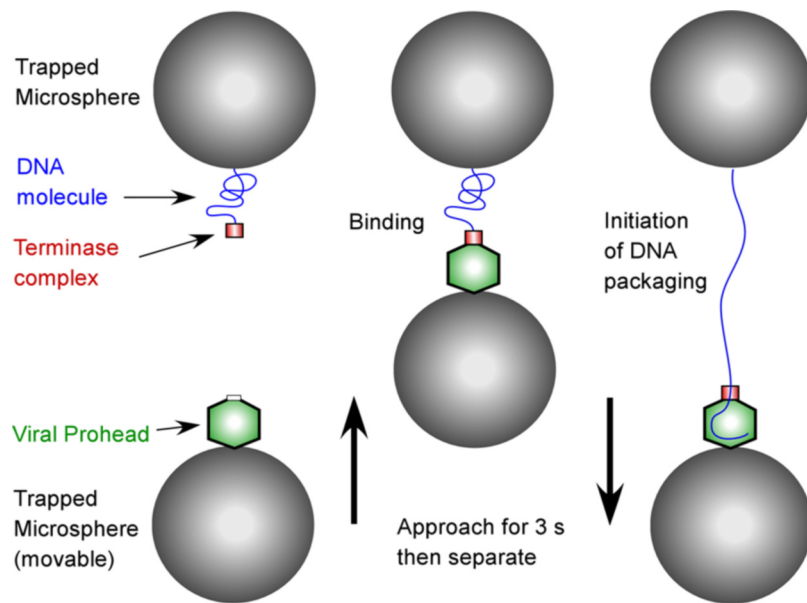

Fig. S1. Cartoon of optical tweezers assay tailored for bacteriophage  $\lambda$ .

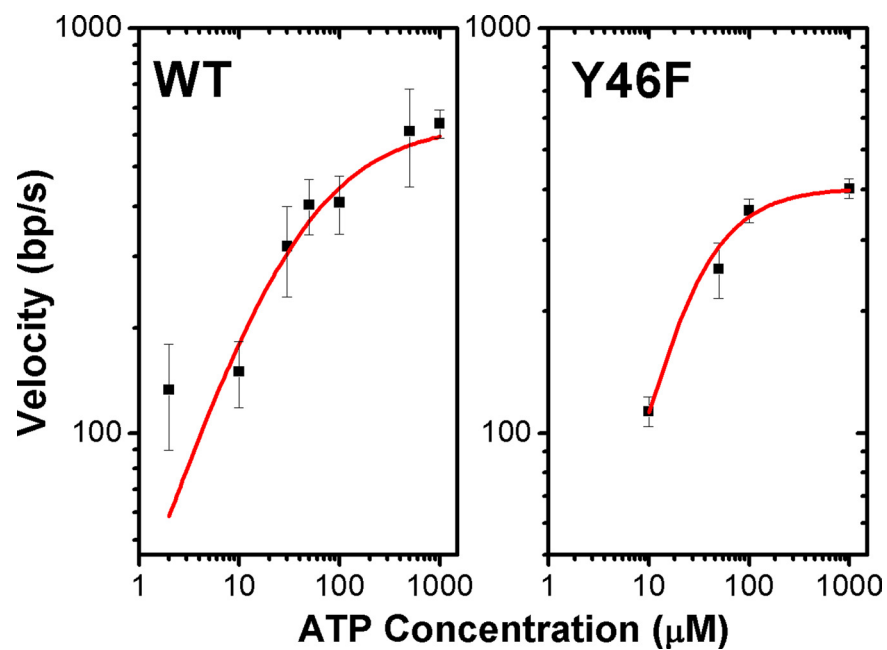

**Fig. S2.** ATP concentration ( $\mu\text{M}$ ) vs. velocity of translocation (bp/s) in WT and Y46F. Measurements were taken with an optical tweezers assay using a force feedback  $\approx 5$  pN as described in the text. In red is the fit to the Hill equation with a constraint on  $V_{\text{max}}$  described in the text. Errors are SE.

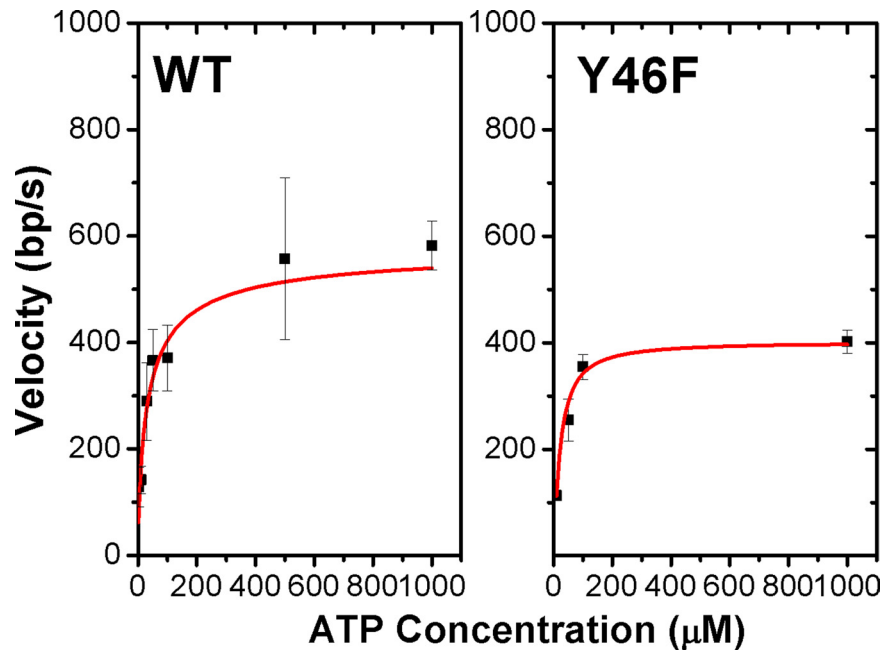

Fig. S3. Linear-linear plot version of Fig. S2: ATP concentration ( $\mu\text{M}$ ) vs. velocity of translocation (bp/s) in WT and Y46F. In red is the fit to the Hill equation described in the text with a constraint on  $V_{\text{max}}$ . Discarding the 2- $\mu\text{M}$  data point for the WT ATP concentration vs. velocity plot gives an  $n = 0.91 \pm 0.11$  value when fit to the Hill equation.

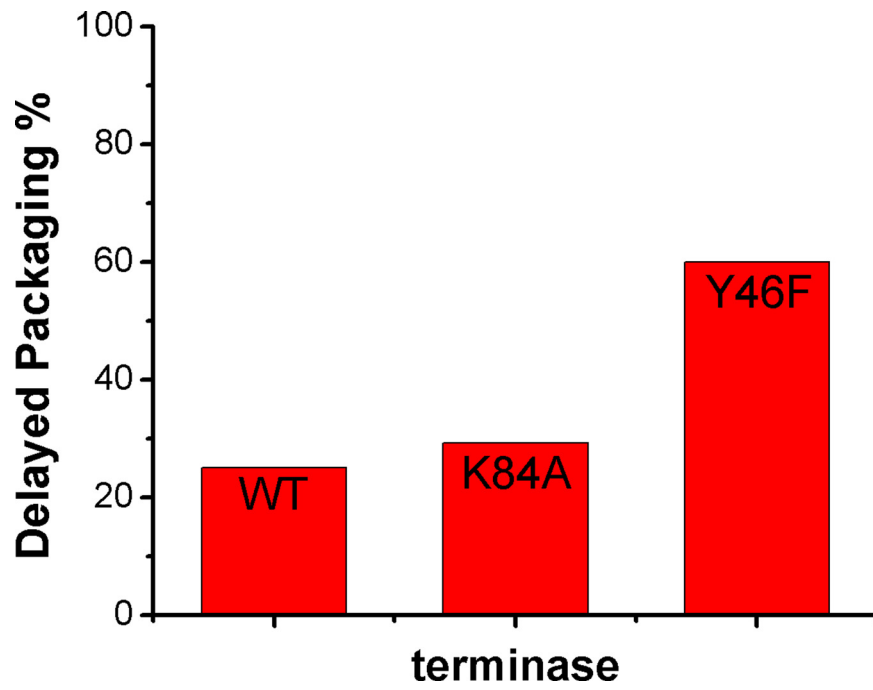

**Fig. S4.** Percentage of delayed initiation in packaging events ( $t_{\text{start}} > 0$  s) in various terminases measured with an optical tweezers assay. Packaging events were initiated with an  $\approx 5$ -pN force clamp.

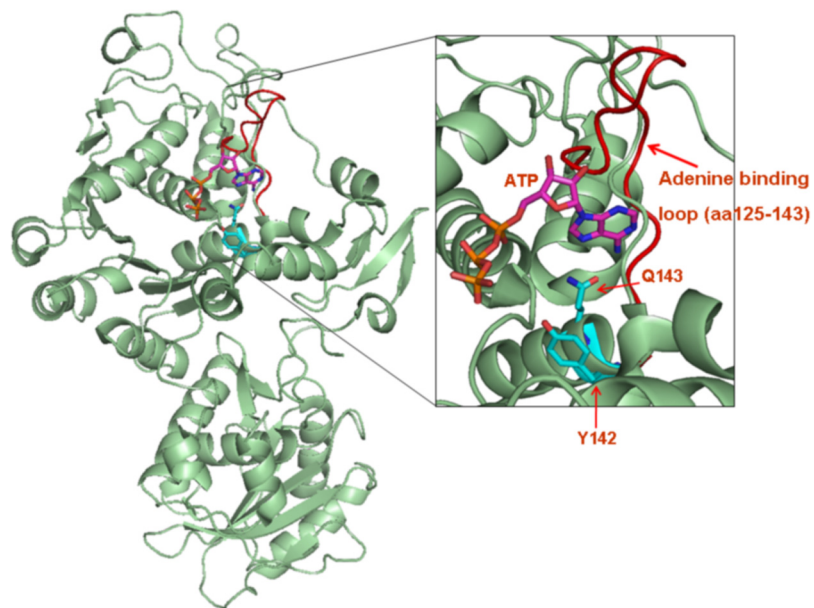

**Fig. S5.** The crystal structure of T4's gp17 with ATP modeled to be inserted in the catalytic pocket. The adenine-binding or Q motif is zoomed in. The analogous residues to  $\lambda$  gpA's Y46 and Q47 in T4 (Y142, Q143) are shown in cyan (courtesy of K. Kondabagil and V. Rao).

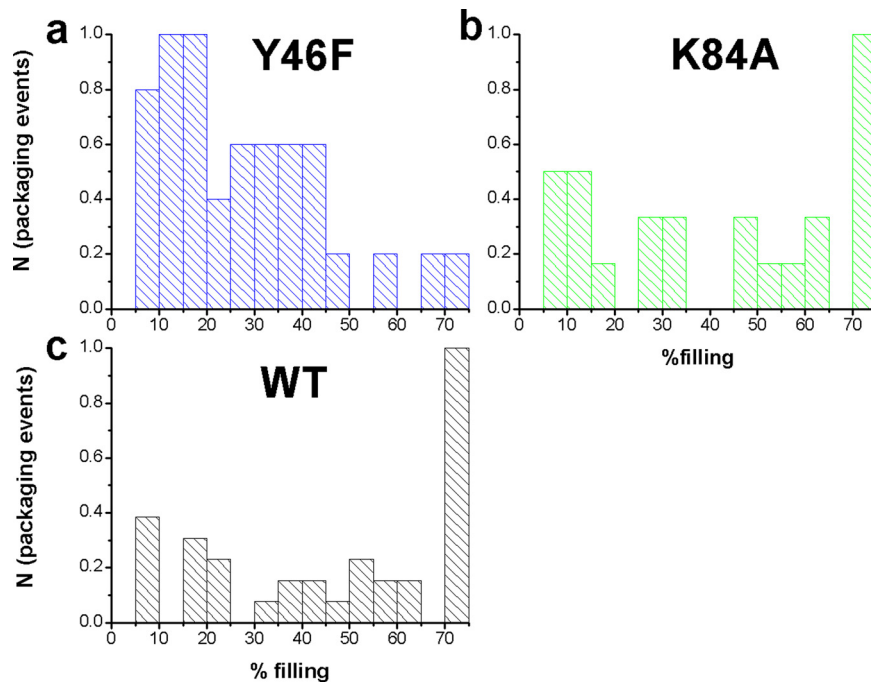

**Fig. S6.** Histograms of stalling dependence on filling in various terminases: The final lengths (converted to filling percentages) at which the translocating complexes stalled were measured and compiled in bins of 5% filling. Packaging events are normalized to the bin with the largest number of events.

**Table S1. Velocities for DNA translocation of the  $\lambda$  packaging motor measured at various ATP concentrations used for Figs. S2 and S3**

| ATP concentration, $\mu$ M | WT velocity, bp/s | SE   | Y46F velocity, bp/s | SE   |
|----------------------------|-------------------|------|---------------------|------|
| 2                          | 128               | 37   | —                   | —    |
| 10                         | 141               | 26   | 113.3               | 9.56 |
| 30                         | 289               | 72   | —                   | —    |
| 50                         | 366               | 57   | 254.7               | 39.8 |
| 100                        | 370               | 61   | 354.6               | 23.7 |
| 500                        | 557               | 151  | —                   | —    |
| 1,000                      | 582               | 46.2 | 402                 | 22   |
